# Supplementary material for: Triple negative breast cancer cells acquire lymphocyte proteins and genomic DNA during trogocytosis with T cells
Source: PeerJ. 2025 Mar 31;13:e19236. doi: 10.7717/peerj.19236 (PMC11967428; doi:10.7717/peerj.19236)
Supplement: Supplemental Information 5 [file peerj-13-19236-s005.xlsx]

## Sheet: Fig. 1B
Stage 1 (% Cells Expressing CD45RA)	Stage 2 (% Cells Expressing CD45RA)	Stage 3 (% Cells Expressing CD45RA)	Stage 4 (% Cells Expressing CD45 RA)
18.1122	31.0345	16.9072	40.73
27.5362	32.9114	39.2324	38.52
29.2308	38.6179	40.8451
38.6719	45.9075	13.6213
	18.7348	39.0769
	35.2564	20.2847
	16.8044	47.8261
	21.6625
	35.2941
	23.4727
	29.7134
	28.1508
	20
	18.7643
	16.9972
	39.1403
	20.9375
	43.956
	36.7893
	12.9412
	37.6953
	42.2122
	58.209
	18.2432
	31.25
	21.8462
	43.8017
	31.3505
	35.3941
	19.7452
	28.3333
	34.7692
	32.0661
	16.3303
	42.9558
	50
	47.5746
	16.9753
	41.4286
	29.8913
	26.6667

## Sheet: Fig 2B
	Transwell Co-Culture		Co-Culture			2-Way ANOVA Analysis
MDAMB231	1	1	16.7405	17.244		Compare each cell mean with the other cell mean in that row
MDAMB436	1	1	5.82064	5.041
						Number of families	1
						Number of comparisons per family	2
						Alpha	0.05
						Uncorrected Fisher's LSD	Mean Diff.	95.00% CI of diff.	Below threshold?	Summary	Individual P Value
						Transwell Co-Culture - Co-Culture
						MDAMB231	-15.99	-16.90 to -15.08	Yes	****	<0.0001
						MDAMB436	-4.431	-5.342 to -3.520	Yes	***	0.0002
						Test details	Mean 1	Mean 2	Mean Diff.	SE of diff.	N1	N2	t	DF
						Transwell Co-Culture - Co-Culture
						MDAMB231	1	16.99	-15.99	0.3281	2	2	48.74	4
						MDAMB436	1	5.431	-4.431	0.3281	2	2	13.5	4

## Sheet: Fig 2C
Monoculture	Co-Culture		Unpaired T Test
1	57.9606		Table Analyzed	Col: Entering replicate data
1	65.2543
1	77.2788		Column B	Co-Culture
			vs.	vs.
			Column A	Monoculture
			Unpaired t test
			P value	0.0003
			P value summary	***
			Significantly different (P < 0.05)?	Yes
			One- or two-tailed P value?	Two-tailed
			t, df	t=11.69, df=4
			How big is the difference?
			Mean of column A	1
			Mean of column B	66.83
			Difference between means (B - A) ± SEM	65.83 ± 5.632
			95% confidence interval	50.19 to 81.47
			R squared (eta squared)	0.9716
			F test to compare variances
			F, DFn, Dfd	Infinity, 2, 2
			P value	<0.0001
			P value summary	****
			Significantly different (P < 0.05)?	Yes
			Data analyzed
			Sample size, column A	3
			Sample size, column B	3

## Sheet: Fig S2D
Monoculture	Co-Culture		Unpaired T Test
1	0.720465		Table Analyzed	Co-Cult v. T Cell RNA
1	0.568015
1	0.383953		Column B	Co-Culture
			vs.	vs.
			Column A	Monoculture
			Unpaired t test
			P value	0.0104
			P value summary	*
			Significantly different (P < 0.05)?	Yes
			One- or two-tailed P value?	Two-tailed
			t, df	t=4.549, df=4
			How big is the difference?
			Mean of column A	1
			Mean of column B	0.5575
			Difference between means (B - A) ± SEM	-0.4425 ± 0.09729
			95% confidence interval	-0.7126 to -0.1724
			R squared (eta squared)	0.838
			F test to compare variances
			F, DFn, Dfd	Infinity, 2, 2
			P value	<0.0001
			P value summary	****
			Significantly different (P < 0.05)?	Yes
			Data analyzed
			Sample size, column A	3
			Sample size, column B	3

## Sheet: Fig 3B
	0 Hour Co-Culture	4 Hour Co-Culture	8 Hour Co-Culture	16 Hour Co-Culture		Ordinary One-Way ANOVA
% Cells Containing Trogosomes	0	12.1	46.2	66.78		Number of families	1
	0	11.4	51.4	64.7		Number of comparisons per family	6
	0	12.9	32.3	64		Alpha	0.05
						Tukey's multiple comparisons test	Mean Diff.	95.00% CI of diff.	Below threshold?	Summary	Adjusted P Value
						0 Hour Co-Culture vs. 4 Hour Co-Culture	-12.13	-25.22 to 0.9509	No	ns	0.0694	A-B
						0 Hour Co-Culture vs. 8 Hour Co-Culture	-43.3	-56.38 to -30.22	Yes	****	<0.0001	A-C
						0 Hour Co-Culture vs. 16 Hour Co-Culture	-65.16	-78.24 to -52.08	Yes	****	<0.0001	A-D
						4 Hour Co-Culture vs. 8 Hour Co-Culture	-31.17	-44.25 to -18.08	Yes	***	0.0003	B-C
						4 Hour Co-Culture vs. 16 Hour Co-Culture	-53.03	-66.11 to -39.94	Yes	****	<0.0001	B-D
						8 Hour Co-Culture vs. 16 Hour Co-Culture	-21.86	-34.94 to -8.776	Yes	**	0.003	C-D
						Test details	Mean 1	Mean 2	Mean Diff.	SE of diff.	n1	n2	q	DF
						0 Hour Co-Culture vs. 4 Hour Co-Culture	0	12.13	-12.13	4.086	3	3	4.2	8
						0 Hour Co-Culture vs. 8 Hour Co-Culture	0	43.3	-43.3	4.086	3	3	14.99	8
						0 Hour Co-Culture vs. 16 Hour Co-Culture	0	65.16	-65.16	4.086	3	3	22.55	8
						4 Hour Co-Culture vs. 8 Hour Co-Culture	12.13	43.3	-31.17	4.086	3	3	10.79	8
						4 Hour Co-Culture vs. 16 Hour Co-Culture	12.13	65.16	-53.03	4.086	3	3	18.35	8
						8 Hour Co-Culture vs. 16 Hour Co-Culture	43.3	65.16	-21.86	4.086	3	3	7.566	8
						Compact letter display
						16 Hour Co-Culture	A
						8 Hour Co-Culture	B
						4 Hour Co-Culture	C
						0 Hour Co-Culture	C

## Sheet: Fig 3C
	4 Hour Co-Culture	8 Hour Co-Culture	16 Hour Co-Culture		Ordinary One-Way ANOVA
Individual Trogosome Diameter	1.167	4.535	3.401		Table Analyzed	Col: Entering replicate data
	2.328	2.92	5.537		Data sets analyzed	A-C
	2.74	2.097	5.505
	3.899	3.728	6.104		ANOVA summary
	3.333	2.05	6.01		F	13.07
	4.442	6.721	6.651		P value	<0.0001
	4.379	2.05	5.719		P value summary	****
	5.585	1.584	3.636		Significant diff. among means (P < 0.05)?	Yes
	5.358	3.448	4.935		R squared	0.3182
	3.113	1.713	4.758
	1.914	2.509	3.981		Brown-Forsythe test
	1.712	1.491	4.034		F (DFn, DFd)	1.446 (2, 56)
		5.57	4.56		P value	0.2441
		1.905	5.032		P value summary	ns
		7.149	5.032		Are SDs significantly different (P < 0.05)?	No
		5.284	4.767
		5.923	3.106		Bartlett's test
		2.356	7.632		Bartlett's statistic (corrected)	3.401
		3.155	4.609		P value	0.1826
			7.241		P value summary	ns
			7.478		Are SDs significantly different (P < 0.05)?	No
			5.646
			6.227		ANOVA table	SS	DF	MS	F (DFn, DFd)	P value
			5.238		Treatment (between columns)	58.02	2	29.01	F (2, 56) = 13.07	P<0.0001
			6.935		Residual (within columns)	124.3	56	2.22
			7.057		Total	182.3	58
			4.51
			6.065		Data summary
					Number of treatments (columns)	3
					Number of values (total)	59
