# Supplementary material for: Triple negative breast cancer cells acquire lymphocyte proteins and genomic DNA during trogocytosis with T cells
Source: PeerJ. 2025 Mar 31;13:e19236. doi: 10.7717/peerj.19236 (PMC11967428; doi:10.7717/peerj.19236)
Supplement: Supplemental Information 6 [file peerj-13-19236-s006.xls]

## Sheet: Sheet1
ITEM TO CHECK	IMPORTANCE	CHECKLIST
EXPERIMENTAL DESIGN
Definition of experimental and control groups	E	LINE 139/FIG2/SUPP FIG 2 - Experimental - Sorted Co-Cultured MDAMB231Cells Expressing CD45, Sorted Co-Cultured T Cells; Control - Monocultured MDAMB231 and T cells
Number within each group	E	LINE 135 - 3
Assay carried out by core lab or investigator's lab?	D	Investigator Lab
Acknowledgement of authors' contributions	D
SAMPLE
Description	E	LINE 121 - Co-Cultured Tumor and T cells were sorted on a FACS AriaII based on BFP and CD45 expression and were kept on ice the entirety of the extraction
Volume/mass of sample processed	D
Microdissection or macrodissection	E	LINE 123 - As these were cell lines, no dissection occurred.
Processing procedure	E	LINE 122 - Cell lines were trypsinized the morning prior to the sort
If frozen - how and how quickly?	E	N/A
If fixed - with what, how quickly?	E	N/A
Sample storage conditions and duration (especially for FFPE samples)	E	LINE 123 - Cells were kept on ice after trypsinization and were sorted immediately after processing for FACS
NUCLEIC ACID EXTRACTION
Procedure and/or instrumentation	E	LINE 125 - Co-Cultured Tumor and T cells were sorted on a FACS AriaII based on BFP and CD45 expression and were extracted using the Qiagen RNAEasy Plus Micro Kit
Name of kit and details of any modifications	E	LINE 124- Qiagen RNAeasy Plus Micro Kitt; Used Protocol Directions
Source of additional reagents used	D
Details of DNase or RNAse treatment	E	LINE 124 - Lysates were processed through a gDNA removal column
Contamination assessment (DNA or RNA)	E
Nucleic acid quantification	E	LINE 125 - 30-40 ng/uL total
Instrument and method	E	LINE 125 - ThermoFisher Scientific NanoDrop 2000
Purity (A260/A280)	D
Yield	D
RNA integrity method/instrument	E
RIN/RQI or Cq of 3' and 5' transcripts	E
Electrophoresis traces	D
Inhibition testing (Cq dilutions, spike or other)	E
REVERSE TRANSCRIPTION
Complete reaction conditions	E	LINE 126 - Used Invitrogen High Capacity Reverse Transcription Kit, According to Protocol Directions
Amount of RNA and reaction volume	E	LINE 126 - 400 ng total in a final of 10 uL Reaction
Priming oligonucleotide (if using GSP) and concentration	E	LINE 126 - Used mixed/random primers available from kits
Reverse transcriptase and concentration	E	LINE 126 - Used RT Enzyme from Kit
Temperature and time	E	LINE 126 - Used parameters for Kit
Manufacturer of reagents and catalogue numbers	D
Cqs with and without RT	D*
Storage conditions of cDNA	D	LINE 128 - Stored at -20C
qPCR TARGET INFORMATION
If multiplex, efficiency and LOD of each assay.	E	N/A
Sequence accession number	E	LINE 131 - Gene ID: 5788
Location of amplicon	D
Amplicon length	E	LINE 131 - 63 bp
In silico specificity screen (BLAST, etc)	E	LINE 132 - BLAST, SnapGene
Pseudogenes, retropseudogenes or other homologs?	D
Sequence alignment	D
Secondary structure analysis of amplicon	D
Location of each primer by exon or intron (if applicable)	E	N/A
What splice variants are targeted?	E	N/A
qPCR OLIGONUCLEOTIDES
Primer sequences	E	LINE 130 - See Methods
RTPrimerDB Identification Number	D
Probe sequences	D**
Location and identity of any modifications	E	LINE 130 - N/A, See Methods
Manufacturer of oligonucleotides	D
Purification method	D
qPCR PROTOCOL
Complete reaction conditions	E	LINE 134 - See Methods
Reaction volume and amount of cDNA/DNA	E	LINE 134 - 20 uL Final Volume
Primer, (probe), Mg++ and dNTP concentrations	E	LINE 133 - 10 mM final primer mix, Mg and DNTP are incorporated in SYBR mix
Polymerase identity and concentration	E	LINE 133 - iTaq SYBR
Buffer/kit identity and manufacturer	E	LINE 133 - iTaq SYBR
Exact chemical constitution of the buffer	D
Additives (SYBR Green I, DMSO, etc.)	E	LINE 133 - SYBR Green
Manufacturer of plates/tubes and catalog number	D
Complete thermocycling parameters	E	LINE 135 - See Methods and QuantStudio3 Manual
Reaction setup (manual/robotic)	D
Manufacturer of qPCR instrument	E	LINE 135 - AppliedBiosystems
qPCR VALIDATION
Evidence of optimisation (from gradients)	D
Specificity (gel, sequence, melt, or digest)	E	LINE 137 - Melt Curve
For SYBR Green I, Cq of the NTC	E	LINE 137 - Undetected
Standard curves with slope and y-intercept	E
PCR efficiency calculated from slope	E
Confidence interval for PCR efficiency or standard error	D
r2 of standard curve	E
Linear dynamic range	E
Cq variation at lower limit	E
Confidence intervals throughout range	D
Evidence for limit of detection	E	LINE 138 - No Cqs above 35 were detected
If multiplex, efficiency and LOD of each assay.	E	N/A
DATA ANALYSIS
qPCR analysis program (source, version)	E	LINE 143 - Excel; Graphpad Prism
Cq method determination	E	LINE 142 - Values output by QuantStudio3 machine and ThermoFisher Connect Software
Outlier identification and disposition	E
Results of NTCs	E	LINE 137 - No NTCs detected
Justification of number and choice of reference genes	E	LINE 141 - GAPDH, Cq value less than 20
Description of normalisation method	E	LINE 139 - Relative Quantification to Housekeeping Genes
Number and concordance of biological replicates	D
Number and stage (RT or qPCR) of technical replicates	E	LINE 134 - 3
Repeatability (intra-assay variation)	E
Reproducibility (inter-assay variation, %CV)	D
Power analysis	D
Statistical methods for result significance	E	FIG. 2 - Unpaired T Test
Software (source, version)	E	LINE 141/RAW DATA FILE - Graphpad Prism 10
Cq or raw data submission using RDML	D
Table 1. MIQE checklist for authors, reviewers and editors. All essential information (E) must be submitted with the manuscript. Desirable
information (D) should be submitted if available. If using primers obtained from RTPrimerDB, information on qPCR target, oligonucleotides,
protocols and validation is available from that source.
*: Assessing the absence of DNA using a no RT assay is essential when first extracting RNA. Once the sample has been validated as
RDNA-free, inclusion of a no-RT control is desirable, but no longer essential.
**: Disclosure of the probe sequence is highly desirable and strongly encouraged. However, since not all commercial pre-designed assay
vendors provide this information, it cannot be an essential requirement. Use of such assays is advised against.
